# Supplementary material for: The preparation and structure of Ge3F8– a new mixed-valence fluoride of germanium, a convenient source of GeF2
Source: Royal Society of Chemistry journal article supplement (doi:10.1039/c4dt02265c), 2014-08-14
Supplement: c4dt02265c1.pdf [file c4dt02265c1.pdf]

ESI

**The preparation and structure of Ge<sub>3</sub>F<sub>8</sub>, a new mixed-valence fluoride of germanium, a convenient source of GeF<sub>2</sub>**

Andrew L. Hector, Andrew Jolleys, William Levason, David Pugh and Gillian Reid

Chemistry, University of Southampton, Southampton SO17 1BJ, UK.

[wxl@soton.ac.uk](mailto:wxl@soton.ac.uk)

**Experimental Section**

GeF<sub>4</sub> and Ge powder were obtained from Aldrich and used as received. The syntheses were carried out under rigorously anhydrous conditions, and all the solid germanium fluorides were handled in a glove box (water < 2 ppm).

**Synthesis of Ge<sub>3</sub>F<sub>8</sub>:** In a typical preparation, a 300 mL Monel autoclave (Autoclave Engineers Ltd.) fitted with a Autoclave Engineers Monel valve, was evacuated (10<sup>-3</sup> mm) and heated at 400 K for 4 h, to remove surface moisture. It was then cooled, filled with dry N<sub>2</sub> and transferred to a glove box. The autoclave was loaded with Ge powder (3.1 g) in an alumina crucible, evacuated, and then filled to 4 bar pressure with GeF<sub>4</sub>. The autoclave was sealed, and heated electrically to 390 K for 48 h, after which it was allowed to cool to room temperature. The residual GeF<sub>4</sub> was pumped away, the autoclave refilled with dry N<sub>2</sub> and opened in the glove box. The white crystalline deposit on the lid and upper walls was removed and stored in sealed containers in the glove box (2.8 g). Residual Ge powder was also present in the crucible.

**Synthesis of GeF<sub>2</sub>:** The crystals obtained above (1.0 g) were transferred to a pre-dried glass apparatus and sublimed by heating *in vacuo* (390 K / 0.5 mm) onto a glass cold-finger. The white microcrystalline deposit was transferred to the glove box, collected and stored in a sealed container in the glove box. Yield: ~0.5 g, which corresponds to an overall yield of GeF<sub>2</sub> of ~30% based upon elemental Ge.

**X-Ray data for Ge<sub>3</sub>F<sub>8</sub>:** Formula weight = 369.77, temperature = 100(2) K, λ<sub>1</sub> = 0.71073 Å, crystal system = monoclinic, space group P2<sub>1</sub>/n, Z = 2, with a = 4.9793(7), b = 5.0810(7), c = 11.814(2) Å, β = 90.974(6)°, V = 298.84(7) Å<sup>3</sup>, μ = 15.093 mm<sup>-1</sup>, F(000) = 336, reflections collected 2673, unique reflections 689, R<sub>int</sub> = 0.0426, parameters 52, restraints 0, final R [I > 2σ(I)]: R<sub>1</sub> = 0.0176, wR<sub>2</sub> = 0.0429; R (all data): R<sub>1</sub> = 0.0183, wR<sub>2</sub> = 0.0432.

Diffraction: Rigaku AFC12 goniometer equipped with an enhanced sensitivity (HG) Saturn724+ detector mounted at the window of an FR-E+ SuperBright molybdenum rotating anode generator with VHF Varimax optics (100  $\mu\text{m}$  focus). Cell determination, data collection, data reduction, cell refinement and absorption correction: CrystalClear-SM Expert 2.0 r7. (Rigaku Corporation, Tokyo, Japan, 2011) Structure solution and refinement were routine using WinGX and software packages within. (L. J. Farrugia, *J. Appl. Cryst.*, 2012, **45**, 849)

Powder XRD data were collected with a Rigaku Smartlab diffractometer ( $\text{Cu-K}_{\alpha 1}$  radiation, parallel beam, symmetric flat plate geometry, DTex250 1D detector,  $5^\circ$  soller slits), compared with patterns from ICSD and refined using the GSAS package. Polyhedral structure images were generated using the Vesta package. (K. Momma and F. Izumi, *J. Appl. Cryst.*, 2011, **44**, 1272)

The diffraction pattern from the mixture of germanium fluoride products obtained directly from autoclave reactions between Ge and  $\text{GeF}_4$  is shown in Fig. S1. No correction for preferred orientation has been applied to the patterns of these highly crystalline samples, hence the intensities in the measured pattern do not exactly match the standards.

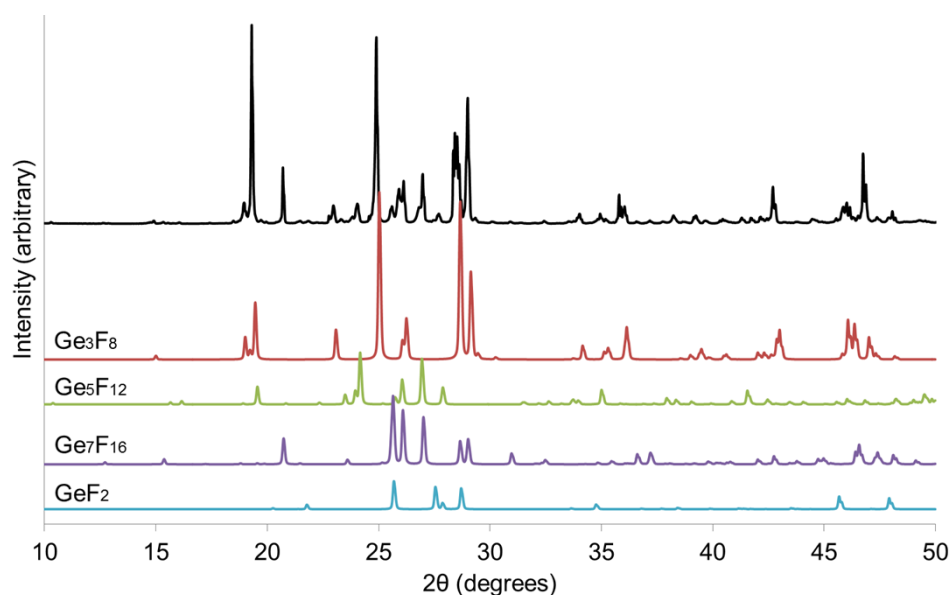

**Fig. S1** The powder XRD pattern of the mixture of products obtained by reacting Ge with  $\text{GeF}_4$  (black). Standard patterns generated from the single crystal structures of  $\text{Ge}_3\text{F}_8$  (this work),  $\text{Ge}_5\text{F}_{12}$  (J. C. Taylor and P. W. Wilson, *J. Am. Chem. Soc.*, 1973, **95**, 1834),  $\text{Ge}_7\text{F}_{16}$  (J. Köhler and J.-H. Chang, *Z. Anorg. Allg. Chem.*, 1997, **623**, 596) and  $\text{GeF}_2$  (J. Trotter, M. Akhtar and N. Bartlett, *J. Chem. Soc. A*, 1966, 30).

Sublimation of the above mixed-phase material resulted in  $\text{GeF}_2$ . This was fitted to the literature structure:

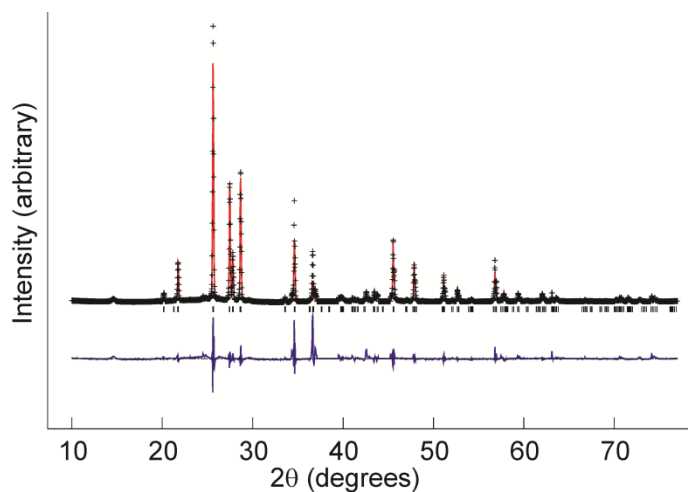

**Fig. S2** Fit to the powder XRD pattern of  $\text{GeF}_2$ . Crosses mark the data points, the red line the fit and the blue line the difference. Black tick marks show the allowed reflection positions in  $P2_12_12_1$ ;  $a = 4.6795(2)$ ,  $b = 5.1740(2)$ ,  $c = 8.3173(4)$  Å. Literature lattice parameters:  $a = 4.682(1)$ ,  $b = 5.158(1)$ ,  $c = 8.312(1)$  Å.  $R_{\text{wp}} = 20.1\%$ ,  $R_{\text{p}} = 13.9\%$ . Spherical harmonic preferred orientation model refined (texture index = 1.42). Peaks from the Al sample holder were excluded at 38, 44 and 65°.
